# Supplementary material for: A Comprehensive Bioinformatic Analysis of NOTCH Pathway Involvement in Stomach Adenocarcinoma
Source: Hindawi journal article supplement (doi:10.1155/2021/4739868), 2021-12-08
Supplement: f1 [file 4739868.f1.docx]

**Table S1.** Association of clinical characteristics of the TCGA-OSCC patients with the expression level of DEFB1 gene.

| **Genes in Notch pathway** | **NOTCH1** | | | **NOTCH2** | | | **NOTCH3** | | | **NOTCH4** | | | **DLL1** | | | **DLL3** | | | **DLL4** | | | **JAG1** | | | **JAG2** | | | **HES1** | | | **HEY1** | | |
| --- | --- | --- | --- | --- | --- | --- | --- | --- | --- | --- | --- | --- | --- | --- | --- | --- | --- | --- | --- | --- | --- | --- | --- | --- | --- | --- | --- | --- | --- | --- | --- | --- | --- |
| **Characteristic** | **Low expression of NOTCH1** | **High expression of NOTCH1** | **p** | **Low expression of NOTCH2** | **High expression of NOTCH2** | **p** | **Low expression of NOTCH3** | **High expression of NOTCH3** | **p** | **Low expression of NOTCH4** | **High expression of NOTCH4** | **p** | **Low expression of DLL1** | **High expression of DLL1** | **p** | **Low expression of DLL3** | **High expression of DLL3** | **p** | **Low expression of DLL4** | **High expression of DLL4** | **p** | **Low expression of JAG1** | **High expression of JAG1** | **p** | **Low expression of JAG2** | **High expression of JAG2** | **p** | **Low expression of HES1** | **High expression of HES1** | **p** | **Low expression of HEY1** | **High expression of HEY1** | **p** |
| **n** | **187** | **188** |  | **187** | **188** |  | **187** | **188** |  | **187** | **188** |  | **187** | **188** |  | **187** | **188** |  | **187** | **188** |  | **187** | **188** |  | **187** | **188** |  | **187** | **188** |  | **187** | **188** |  |
| **T stage, n (%)** |  |  | **0.349** |  |  | **0.001** |  |  | **0.039** |  |  | **0.153** |  |  | **0.494** |  |  | **0.849** |  |  | **0.129** |  |  | **< 0.001** |  |  | **0.137** |  |  | **0.274** |  |  | **0.103** |
| **T1** | **12 (3.3%)** | **7 (1.9%)** |  | **15 (4.1%)** | **4 (1.1%)** |  | **13 (3.5%)** | **6 (1.6%)** |  | **13 (3.5%)** | **6 (1.6%)** |  | **10 (2.7%)** | **9 (2.5%)** |  | **10 (2.7%)** | **9 (2.5%)** |  | **14 (3.8%)** | **5 (1.4%)** |  | **10 (2.7%)** | **9 (2.5%)** |  | **12 (3.3%)** | **7 (1.9%)** |  | **6 (1.6%)** | **13 (3.5%)** |  | **13 (3.5%)** | **6 (1.6%)** |  |
| **T2** | **43 (11.7%)** | **37 (10.1%)** |  | **37 (10.1%)** | **43 (11.7%)** |  | **46 (12.5%)** | **34 (9.3%)** |  | **42 (11.4%)** | **38 (10.4%)** |  | **39 (10.6%)** | **41 (11.2%)** |  | **38 (10.4%)** | **42 (11.4%)** |  | **40 (10.9%)** | **40 (10.9%)** |  | **46 (12.5%)** | **34 (9.3%)** |  | **46 (12.5%)** | **34 (9.3%)** |  | **45 (12.3%)** | **35 (9.5%)** |  | **47 (12.8%)** | **33 (9%)** |  |
| **T3** | **81 (22.1%)** | **87 (23.7%)** |  | **96 (26.2%)** | **72 (19.6%)** |  | **83 (22.6%)** | **85 (23.2%)** |  | **84 (22.9%)** | **84 (22.9%)** |  | **90 (24.5%)** | **78 (21.3%)** |  | **81 (22.1%)** | **87 (23.7%)** |  | **82 (22.3%)** | **86 (23.4%)** |  | **96 (26.2%)** | **72 (19.6%)** |  | **74 (20.2%)** | **94 (25.6%)** |  | **83 (22.6%)** | **85 (23.2%)** |  | **81 (22.1%)** | **87 (23.7%)** |  |
| **T4** | **44 (12%)** | **56 (15.3%)** |  | **38 (10.4%)** | **62 (16.9%)** |  | **40 (10.9%)** | **60 (16.3%)** |  | **42 (11.4%)** | **58 (15.8%)** |  | **44 (12%)** | **56 (15.3%)** |  | **53 (14.4%)** | **47 (12.8%)** |  | **44 (12%)** | **56 (15.3%)** |  | **31 (8.4%)** | **69 (18.8%)** |  | **48 (13.1%)** | **52 (14.2%)** |  | **49 (13.4%)** | **51 (13.9%)** |  | **45 (12.3%)** | **55 (15%)** |  |
| **N stage, n (%)** |  |  | **0.125** |  |  | **0.167** |  |  | **0.445** |  |  | **0.718** |  |  | **0.933** |  |  | **0.163** |  |  | **0.297** |  |  | **0.413** |  |  | **0.585** |  |  | **0.446** |  |  | **0.945** |
| **N0** | **50 (14%)** | **61 (17.1%)** |  | **61 (17.1%)** | **50 (14%)** |  | **58 (16.2%)** | **53 (14.8%)** |  | **53 (14.8%)** | **58 (16.2%)** |  | **58 (16.2%)** | **53 (14.8%)** |  | **48 (13.4%)** | **63 (17.6%)** |  | **47 (13.2%)** | **64 (17.9%)** |  | **60 (16.8%)** | **51 (14.3%)** |  | **49 (13.7%)** | **62 (17.4%)** |  | **54 (15.1%)** | **57 (16%)** |  | **54 (15.1%)** | **57 (16%)** |  |
| **N1** | **56 (15.7%)** | **41 (11.5%)** |  | **51 (14.3%)** | **46 (12.9%)** |  | **49 (13.7%)** | **48 (13.4%)** |  | **50 (14%)** | **47 (13.2%)** |  | **47 (13.2%)** | **50 (14%)** |  | **47 (13.2%)** | **50 (14%)** |  | **54 (15.1%)** | **43 (12%)** |  | **47 (13.2%)** | **50 (14%)** |  | **50 (14%)** | **47 (13.2%)** |  | **43 (12%)** | **54 (15.1%)** |  | **50 (14%)** | **47 (13.2%)** |  |
| **N2** | **37 (10.4%)** | **38 (10.6%)** |  | **40 (11.2%)** | **35 (9.8%)** |  | **37 (10.4%)** | **38 (10.6%)** |  | **38 (10.6%)** | **37 (10.4%)** |  | **36 (10.1%)** | **39 (10.9%)** |  | **42 (11.8%)** | **33 (9.2%)** |  | **36 (10.1%)** | **39 (10.9%)** |  | **39 (10.9%)** | **36 (10.1%)** |  | **40 (11.2%)** | **35 (9.8%)** |  | **36 (10.1%)** | **39 (10.9%)** |  | **37 (10.4%)** | **38 (10.6%)** |  |
| **N3** | **30 (8.4%)** | **44 (12.3%)** |  | **29 (8.1%)** | **45 (12.6%)** |  | **30 (8.4%)** | **44 (12.3%)** |  | **32 (9%)** | **42 (11.8%)** |  | **37 (10.4%)** | **37 (10.4%)** |  | **43 (12%)** | **31 (8.7%)** |  | **36 (10.1%)** | **38 (10.6%)** |  | **31 (8.7%)** | **43 (12%)** |  | **35 (9.8%)** | **39 (10.9%)** |  | **42 (11.8%)** | **32 (9%)** |  | **39 (10.9%)** | **35 (9.8%)** |  |
| **M stage, n (%)** |  |  | **0.382** |  |  | **0.367** |  |  | **0.965** |  |  | **0.646** |  |  | **0.988** |  |  | **0.398** |  |  | **0.965** |  |  | **0.965** |  |  | **0.398** |  |  | **0.415** |  |  | **1.000** |
| **M0** | **161 (45.4%)** | **169 (47.6%)** |  | **170 (47.9%)** | **160 (45.1%)** |  | **167 (47%)** | **163 (45.9%)** |  | **168 (47.3%)** | **162 (45.6%)** |  | **164 (46.2%)** | **166 (46.8%)** |  | **162 (45.6%)** | **168 (47.3%)** |  | **167 (47%)** | **163 (45.9%)** |  | **167 (47%)** | **163 (45.9%)** |  | **168 (47.3%)** | **162 (45.6%)** |  | **163 (45.9%)** | **167 (47%)** |  | **165 (46.5%)** | **165 (46.5%)** |  |
| **M1** | **15 (4.2%)** | **10 (2.8%)** |  | **10 (2.8%)** | **15 (4.2%)** |  | **12 (3.4%)** | **13 (3.7%)** |  | **11 (3.1%)** | **14 (3.9%)** |  | **13 (3.7%)** | **12 (3.4%)** |  | **15 (4.2%)** | **10 (2.8%)** |  | **12 (3.4%)** | **13 (3.7%)** |  | **12 (3.4%)** | **13 (3.7%)** |  | **10 (2.8%)** | **15 (4.2%)** |  | **15 (4.2%)** | **10 (2.8%)** |  | **13 (3.7%)** | **12 (3.4%)** |  |
| **Pathologic stage, n (%)** |  |  | **0.478** |  |  | **0.249** |  |  | **0.049** |  |  | **0.782** |  |  | **0.923** |  |  | **0.188** |  |  | **0.867** |  |  | **0.148** |  |  | **0.289** |  |  | **0.721** |  |  | **0.515** |
| **Stage I** | **26 (7.4%)** | **27 (7.7%)** |  | **32 (9.1%)** | **21 (6%)** |  | **35 (9.9%)** | **18 (5.1%)** |  | **29 (8.2%)** | **24 (6.8%)** |  | **27 (7.7%)** | **26 (7.4%)** |  | **26 (7.4%)** | **27 (7.7%)** |  | **27 (7.7%)** | **26 (7.4%)** |  | **28 (8%)** | **25 (7.1%)** |  | **30 (8.5%)** | **23 (6.5%)** |  | **25 (7.1%)** | **28 (8%)** |  | **32 (9.1%)** | **21 (6%)** |  |
| **Stage II** | **54 (15.3%)** | **57 (16.2%)** |  | **58 (16.5%)** | **53 (15.1%)** |  | **52 (14.8%)** | **59 (16.8%)** |  | **53 (15.1%)** | **58 (16.5%)** |  | **57 (16.2%)** | **54 (15.3%)** |  | **47 (13.4%)** | **64 (18.2%)** |  | **50 (14.2%)** | **61 (17.3%)** |  | **64 (18.2%)** | **47 (13.4%)** |  | **47 (13.4%)** | **64 (18.2%)** |  | **54 (15.3%)** | **57 (16.2%)** |  | **54 (15.3%)** | **57 (16.2%)** |  |
| **Stage III** | **66 (18.8%)** | **84 (23.9%)** |  | **74 (21%)** | **76 (21.6%)** |  | **66 (18.8%)** | **84 (23.9%)** |  | **70 (19.9%)** | **80 (22.7%)** |  | **71 (20.2%)** | **79 (22.4%)** |  | **84 (23.9%)** | **66 (18.8%)** |  | **74 (21%)** | **76 (21.6%)** |  | **66 (18.8%)** | **84 (23.9%)** |  | **75 (21.3%)** | **75 (21.3%)** |  | **72 (20.5%)** | **78 (22.2%)** |  | **74 (21%)** | **76 (21.6%)** |  |
| **Stage IV** | **22 (6.2%)** | **16 (4.5%)** |  | **15 (4.3%)** | **23 (6.5%)** |  | **19 (5.4%)** | **19 (5.4%)** |  | **19 (5.4%)** | **19 (5.4%)** |  | **19 (5.4%)** | **19 (5.4%)** |  | **19 (5.4%)** | **19 (5.4%)** |  | **19 (5.4%)** | **19 (5.4%)** |  | **17 (4.8%)** | **21 (6%)** |  | **16 (4.5%)** | **22 (6.2%)** |  | **22 (6.2%)** | **16 (4.5%)** |  | **19 (5.4%)** | **19 (5.4%)** |  |
| **Primary therapy outcome, n (%)** |  |  | **0.655** |  |  | **0.349** |  |  | **0.525** |  |  | **0.190** |  |  | **0.198** |  |  | **0.063** |  |  | **0.376** |  |  | **0.728** |  |  | **0.543** |  |  | **0.791** |  |  | **0.778** |
| **PD** | **30 (9.5%)** | **35 (11%)** |  | **29 (9.1%)** | **36 (11.4%)** |  | **30 (9.5%)** | **35 (11%)** |  | **33 (10.4%)** | **32 (10.1%)** |  | **36 (11.4%)** | **29 (9.1%)** |  | **28 (8.8%)** | **37 (11.7%)** |  | **35 (11%)** | **30 (9.5%)** |  | **33 (10.4%)** | **32 (10.1%)** |  | **35 (11%)** | **30 (9.5%)** |  | **30 (9.5%)** | **35 (11%)** |  | **32 (10.1%)** | **33 (10.4%)** |  |
| **SD** | **10 (3.2%)** | **7 (2.2%)** |  | **11 (3.5%)** | **6 (1.9%)** |  | **5 (1.6%)** | **12 (3.8%)** |  | **6 (1.9%)** | **11 (3.5%)** |  | **5 (1.6%)** | **12 (3.8%)** |  | **13 (4.1%)** | **4 (1.3%)** |  | **10 (3.2%)** | **7 (2.2%)** |  | **7 (2.2%)** | **10 (3.2%)** |  | **8 (2.5%)** | **9 (2.8%)** |  | **10 (3.2%)** | **7 (2.2%)** |  | **8 (2.5%)** | **9 (2.8%)** |  |
| **PR** | **1 (0.3%)** | **3 (0.9%)** |  | **1 (0.3%)** | **3 (0.9%)** |  | **2 (0.6%)** | **2 (0.6%)** |  | **0 (0%)** | **4 (1.3%)** |  | **3 (0.9%)** | **1 (0.3%)** |  | **1 (0.3%)** | **3 (0.9%)** |  | **3 (0.9%)** | **1 (0.3%)** |  | **3 (0.9%)** | **1 (0.3%)** |  | **1 (0.3%)** | **3 (0.9%)** |  | **2 (0.6%)** | **2 (0.6%)** |  | **1 (0.3%)** | **3 (0.9%)** |  |
| **CR** | **108 (34.1%)** | **123 (38.8%)** |  | **119 (37.5%)** | **112 (35.3%)** |  | **111 (35%)** | **120 (37.9%)** |  | **112 (35.3%)** | **119 (37.5%)** |  | **112 (35.3%)** | **119 (37.5%)** |  | **113 (35.6%)** | **118 (37.2%)** |  | **106 (33.4%)** | **125 (39.4%)** |  | **115 (36.3%)** | **116 (36.6%)** |  | **105 (33.1%)** | **126 (39.7%)** |  | **106 (33.4%)** | **125 (39.4%)** |  | **119 (37.5%)** | **112 (35.3%)** |  |
| **Gender, n (%)** |  |  | **0.150** |  |  | **0.945** |  |  | **0.428** |  |  | **0.150** |  |  | **0.313** |  |  | **0.352** |  |  | **0.428** |  |  | **0.945** |  |  | **0.251** |  |  | **1.000** |  |  | **0.564** |
| **Female** | **74 (19.7%)** | **60 (16%)** |  | **66 (17.6%)** | **68 (18.1%)** |  | **71 (18.9%)** | **63 (16.8%)** |  | **74 (19.7%)** | **60 (16%)** |  | **72 (19.2%)** | **62 (16.5%)** |  | **62 (16.5%)** | **72 (19.2%)** |  | **71 (18.9%)** | **63 (16.8%)** |  | **66 (17.6%)** | **68 (18.1%)** |  | **61 (16.3%)** | **73 (19.5%)** |  | **67 (17.9%)** | **67 (17.9%)** |  | **70 (18.7%)** | **64 (17.1%)** |  |
| **Male** | **113 (30.1%)** | **128 (34.1%)** |  | **121 (32.3%)** | **120 (32%)** |  | **116 (30.9%)** | **125 (33.3%)** |  | **113 (30.1%)** | **128 (34.1%)** |  | **115 (30.7%)** | **126 (33.6%)** |  | **125 (33.3%)** | **116 (30.9%)** |  | **116 (30.9%)** | **125 (33.3%)** |  | **121 (32.3%)** | **120 (32%)** |  | **126 (33.6%)** | **115 (30.7%)** |  | **120 (32%)** | **121 (32.3%)** |  | **117 (31.2%)** | **124 (33.1%)** |  |
| **Race, n (%)** |  |  | **0.327** |  |  | **0.001** |  |  | **0.063** |  |  | **0.122** |  |  | **0.573** |  |  | **0.626** |  |  | **0.490** |  |  | **0.167** |  |  | **0.743** |  |  | **0.017** |  |  | **0.610** |
| **Asian** | **42 (13%)** | **32 (9.9%)** |  | **49 (15.2%)** | **25 (7.7%)** |  | **43 (13.3%)** | **31 (9.6%)** |  | **42 (13%)** | **32 (9.9%)** |  | **38 (11.8%)** | **36 (11.1%)** |  | **36 (11.1%)** | **38 (11.8%)** |  | **40 (12.4%)** | **34 (10.5%)** |  | **43 (13.3%)** | **31 (9.6%)** |  | **38 (11.8%)** | **36 (11.1%)** |  | **25 (7.7%)** | **49 (15.2%)** |  | **36 (11.1%)** | **38 (11.8%)** |  |
| **Black or African American** | **6 (1.9%)** | **5 (1.5%)** |  | **8 (2.5%)** | **3 (0.9%)** |  | **7 (2.2%)** | **4 (1.2%)** |  | **3 (0.9%)** | **8 (2.5%)** |  | **7 (2.2%)** | **4 (1.2%)** |  | **4 (1.2%)** | **7 (2.2%)** |  | **4 (1.2%)** | **7 (2.2%)** |  | **7 (2.2%)** | **4 (1.2%)** |  | **6 (1.9%)** | **5 (1.5%)** |  | **6 (1.9%)** | **5 (1.5%)** |  | **7 (2.2%)** | **4 (1.2%)** |  |
| **White** | **112 (34.7%)** | **126 (39%)** |  | **105 (32.5%)** | **133 (41.2%)** |  | **105 (32.5%)** | **133 (41.2%)** |  | **112 (34.7%)** | **126 (39%)** |  | **115 (35.6%)** | **123 (38.1%)** |  | **121 (37.5%)** | **117 (36.2%)** |  | **116 (35.9%)** | **122 (37.8%)** |  | **112 (34.7%)** | **126 (39%)** |  | **112 (34.7%)** | **126 (39%)** |  | **125 (38.7%)** | **113 (35%)** |  | **115 (35.6%)** | **123 (38.1%)** |  |
| **Age, n (%)** |  |  | **0.493** |  |  | **0.324** |  |  | **0.880** |  |  | **0.789** |  |  | **0.371** |  |  | **0.270** |  |  | **0.222** |  |  | **0.789** |  |  | **0.055** |  |  | **0.880** |  |  | **0.336** |
| **<=65** | **86 (23.2%)** | **78 (21%)** |  | **77 (20.8%)** | **87 (23.5%)** |  | **81 (21.8%)** | **83 (22.4%)** |  | **84 (22.6%)** | **80 (21.6%)** |  | **87 (23.5%)** | **77 (20.8%)** |  | **76 (20.5%)** | **88 (23.7%)** |  | **89 (24%)** | **75 (20.2%)** |  | **84 (22.6%)** | **80 (21.6%)** |  | **91 (24.5%)** | **73 (19.7%)** |  | **81 (21.8%)** | **83 (22.4%)** |  | **86 (23.2%)** | **78 (21%)** |  |
| **>65** | **100 (27%)** | **107 (28.8%)** |  | **109 (29.4%)** | **98 (26.4%)** |  | **105 (28.3%)** | **102 (27.5%)** |  | **102 (27.5%)** | **105 (28.3%)** |  | **99 (26.7%)** | **108 (29.1%)** |  | **109 (29.4%)** | **98 (26.4%)** |  | **98 (26.4%)** | **109 (29.4%)** |  | **102 (27.5%)** | **105 (28.3%)** |  | **93 (25.1%)** | **114 (30.7%)** |  | **105 (28.3%)** | **102 (27.5%)** |  | **97 (26.1%)** | **110 (29.6%)** |  |
| **Histological type, n (%)** |  |  | **0.347** |  |  | **0.196** |  |  | **0.479** |  |  | **0.266** |  |  | **0.040** |  |  | **0.142** |  |  | **0.283** |  |  | **0.955** |  |  | **0.496** |  |  | **0.010** |  |  | **0.091** |
| **Diffuse Type** | **30 (8%)** | **33 (8.8%)** |  | **23 (6.1%)** | **40 (10.7%)** |  | **35 (9.4%)** | **28 (7.5%)** |  | **28 (7.5%)** | **35 (9.4%)** |  | **34 (9.1%)** | **29 (7.8%)** |  | **40 (10.7%)** | **23 (6.1%)** |  | **32 (8.6%)** | **31 (8.3%)** |  | **31 (8.3%)** | **32 (8.6%)** |  | **37 (9.9%)** | **26 (7%)** |  | **42 (11.2%)** | **21 (5.6%)** |  | **26 (7%)** | **37 (9.9%)** |  |
| **Mucinous Type** | **7 (1.9%)** | **12 (3.2%)** |  | **8 (2.1%)** | **11 (2.9%)** |  | **6 (1.6%)** | **13 (3.5%)** |  | **7 (1.9%)** | **12 (3.2%)** |  | **5 (1.3%)** | **14 (3.7%)** |  | **11 (2.9%)** | **8 (2.1%)** |  | **6 (1.6%)** | **13 (3.5%)** |  | **10 (2.7%)** | **9 (2.4%)** |  | **7 (1.9%)** | **12 (3.2%)** |  | **9 (2.4%)** | **10 (2.7%)** |  | **7 (1.9%)** | **12 (3.2%)** |  |
| **Not Otherwise Specified** | **112 (29.9%)** | **95 (25.4%)** |  | **110 (29.4%)** | **97 (25.9%)** |  | **104 (27.8%)** | **103 (27.5%)** |  | **106 (28.3%)** | **101 (27%)** |  | **109 (29.1%)** | **98 (26.2%)** |  | **92 (24.6%)** | **115 (30.7%)** |  | **104 (27.8%)** | **103 (27.5%)** |  | **104 (27.8%)** | **103 (27.5%)** |  | **101 (27%)** | **106 (28.3%)** |  | **105 (28.1%)** | **102 (27.3%)** |  | **104 (27.8%)** | **103 (27.5%)** |  |
| **Papillary Type** | **1 (0.3%)** | **4 (1.1%)** |  | **2 (0.5%)** | **3 (0.8%)** |  | **2 (0.5%)** | **3 (0.8%)** |  | **3 (0.8%)** | **2 (0.5%)** |  | **1 (0.3%)** | **4 (1.1%)** |  | **2 (0.5%)** | **3 (0.8%)** |  | **3 (0.8%)** | **2 (0.5%)** |  | **3 (0.8%)** | **2 (0.5%)** |  | **3 (0.8%)** | **2 (0.5%)** |  | **2 (0.5%)** | **3 (0.8%)** |  | **2 (0.5%)** | **3 (0.8%)** |  |
| **Signet Ring Type** | **4 (1.1%)** | **7 (1.9%)** |  | **5 (1.3%)** | **6 (1.6%)** |  | **4 (1.1%)** | **7 (1.9%)** |  | **3 (0.8%)** | **8 (2.1%)** |  | **2 (0.5%)** | **9 (2.4%)** |  | **5 (1.3%)** | **6 (1.6%)** |  | **3 (0.8%)** | **8 (2.1%)** |  | **4 (1.1%)** | **7 (1.9%)** |  | **4 (1.1%)** | **7 (1.9%)** |  | **6 (1.6%)** | **5 (1.3%)** |  | **4 (1.1%)** | **7 (1.9%)** |  |
| **Tubular Type** | **33 (8.8%)** | **36 (9.6%)** |  | **39 (10.4%)** | **30 (8%)** |  | **36 (9.6%)** | **33 (8.8%)** |  | **40 (10.7%)** | **29 (7.8%)** |  | **36 (9.6%)** | **33 (8.8%)** |  | **37 (9.9%)** | **32 (8.6%)** |  | **39 (10.4%)** | **30 (8%)** |  | **34 (9.1%)** | **35 (9.4%)** |  | **34 (9.1%)** | **35 (9.4%)** |  | **23 (6.1%)** | **46 (12.3%)** |  | **44 (11.8%)** | **25 (6.7%)** |  |
| **Residual tumor, n (%)** |  |  | **0.363** |  |  | **0.553** |  |  | **0.834** |  |  | **0.745** |  |  | **0.835** |  |  | **0.777** |  |  | **0.102** |  |  | **0.340** |  |  | **0.408** |  |  | **0.782** |  |  | **0.435** |
| **R0** | **135 (41%)** | **163 (49.5%)** |  | **152 (46.2%)** | **146 (44.4%)** |  | **141 (42.9%)** | **157 (47.7%)** |  | **141 (42.9%)** | **157 (47.7%)** |  | **146 (44.4%)** | **152 (46.2%)** |  | **154 (46.8%)** | **144 (43.8%)** |  | **142 (43.2%)** | **156 (47.4%)** |  | **143 (43.5%)** | **155 (47.1%)** |  | **146 (44.4%)** | **152 (46.2%)** |  | **141 (42.9%)** | **157 (47.7%)** |  | **153 (46.5%)** | **145 (44.1%)** |  |
| **R1** | **6 (1.8%)** | **9 (2.7%)** |  | **7 (2.1%)** | **8 (2.4%)** |  | **6 (1.8%)** | **9 (2.7%)** |  | **7 (2.1%)** | **8 (2.4%)** |  | **7 (2.1%)** | **8 (2.4%)** |  | **7 (2.1%)** | **8 (2.4%)** |  | **11 (3.3%)** | **4 (1.2%)** |  | **10 (3%)** | **5 (1.5%)** |  | **5 (1.5%)** | **10 (3%)** |  | **7 (2.1%)** | **8 (2.4%)** |  | **9 (2.7%)** | **6 (1.8%)** |  |
| **R2** | **10 (3%)** | **6 (1.8%)** |  | **6 (1.8%)** | **10 (3%)** |  | **8 (2.4%)** | **8 (2.4%)** |  | **6 (1.8%)** | **10 (3%)** |  | **9 (2.7%)** | **7 (2.1%)** |  | **7 (2.1%)** | **9 (2.7%)** |  | **6 (1.8%)** | **10 (3%)** |  | **7 (2.1%)** | **9 (2.7%)** |  | **9 (2.7%)** | **7 (2.1%)** |  | **9 (2.7%)** | **7 (2.1%)** |  | **6 (1.8%)** | **10 (3%)** |  |
| **Histologic grade, n (%)** |  |  | **0.253** |  |  | **0.067** |  |  | **0.237** |  |  | **0.375** |  |  | **0.039** |  |  | **0.076** |  |  | **0.879** |  |  | **0.265** |  |  | **0.676** |  |  | **0.018** |  |  | **0.226** |
| **G1** | **6 (1.6%)** | **4 (1.1%)** |  | **5 (1.4%)** | **5 (1.4%)** |  | **5 (1.4%)** | **5 (1.4%)** |  | **6 (1.6%)** | **4 (1.1%)** |  | **1 (0.3%)** | **9 (2.5%)** |  | **7 (1.9%)** | **3 (0.8%)** |  | **5 (1.4%)** | **5 (1.4%)** |  | **4 (1.1%)** | **6 (1.6%)** |  | **5 (1.4%)** | **5 (1.4%)** |  | **6 (1.6%)** | **4 (1.1%)** |  | **6 (1.6%)** | **4 (1.1%)** |  |
| **G2** | **76 (20.8%)** | **61 (16.7%)** |  | **79 (21.6%)** | **58 (15.8%)** |  | **77 (21%)** | **60 (16.4%)** |  | **75 (20.5%)** | **62 (16.9%)** |  | **70 (19.1%)** | **67 (18.3%)** |  | **59 (16.1%)** | **78 (21.3%)** |  | **72 (19.7%)** | **65 (17.8%)** |  | **76 (20.8%)** | **61 (16.7%)** |  | **72 (19.7%)** | **65 (17.8%)** |  | **56 (15.3%)** | **81 (22.1%)** |  | **76 (20.8%)** | **61 (16.7%)** |  |
| **G3** | **103 (28.1%)** | **116 (31.7%)** |  | **99 (27%)** | **120 (32.8%)** |  | **103 (28.1%)** | **116 (31.7%)** |  | **105 (28.7%)** | **114 (31.1%)** |  | **112 (30.6%)** | **107 (29.2%)** |  | **116 (31.7%)** | **103 (28.1%)** |  | **108 (29.5%)** | **111 (30.3%)** |  | **104 (28.4%)** | **115 (31.4%)** |  | **105 (28.7%)** | **114 (31.1%)** |  | **122 (33.3%)** | **97 (26.5%)** |  | **102 (27.9%)** | **117 (32%)** |  |
| **Anatomic neoplasm subdivision, n (%)** |  |  | **0.177** |  |  | **0.966** |  |  | **0.416** |  |  | **0.046** |  |  | **0.633** |  |  | **0.270** |  |  | **< 0.001** |  |  | **0.245** |  |  | **0.354** |  |  | **0.580** |  |  | **0.360** |
| **Antrum/Distal** | **73 (20.2%)** | **65 (18%)** |  | **66 (18.3%)** | **72 (19.9%)** |  | **73 (20.2%)** | **65 (18%)** |  | **81 (22.4%)** | **57 (15.8%)** |  | **72 (19.9%)** | **66 (18.3%)** |  | **71 (19.7%)** | **67 (18.6%)** |  | **84 (23.3%)** | **54 (15%)** |  | **76 (21.1%)** | **62 (17.2%)** |  | **66 (18.3%)** | **72 (19.9%)** |  | **67 (18.6%)** | **71 (19.7%)** |  | **63 (17.5%)** | **75 (20.8%)** |  |
| **Cardia/Proximal** | **26 (7.2%)** | **22 (6.1%)** |  | **25 (6.9%)** | **23 (6.4%)** |  | **25 (6.9%)** | **23 (6.4%)** |  | **22 (6.1%)** | **26 (7.2%)** |  | **25 (6.9%)** | **23 (6.4%)** |  | **19 (5.3%)** | **29 (8%)** |  | **23 (6.4%)** | **25 (6.9%)** |  | **24 (6.6%)** | **24 (6.6%)** |  | **29 (8%)** | **19 (5.3%)** |  | **27 (7.5%)** | **21 (5.8%)** |  | **26 (7.2%)** | **22 (6.1%)** |  |
| **Fundus/Body** | **53 (14.7%)** | **77 (21.3%)** |  | **64 (17.7%)** | **66 (18.3%)** |  | **56 (15.5%)** | **74 (20.5%)** |  | **52 (14.4%)** | **78 (21.6%)** |  | **64 (17.7%)** | **66 (18.3%)** |  | **65 (18%)** | **65 (18%)** |  | **46 (12.7%)** | **84 (23.3%)** |  | **59 (16.3%)** | **71 (19.7%)** |  | **59 (16.3%)** | **71 (19.7%)** |  | **64 (17.7%)** | **66 (18.3%)** |  | **64 (17.7%)** | **66 (18.3%)** |  |
| **Gastroesophageal Junction** | **22 (6.1%)** | **19 (5.3%)** |  | **22 (6.1%)** | **19 (5.3%)** |  | **20 (5.5%)** | **21 (5.8%)** |  | **21 (5.8%)** | **20 (5.5%)** |  | **17 (4.7%)** | **24 (6.6%)** |  | **25 (6.9%)** | **16 (4.4%)** |  | **22 (6.1%)** | **19 (5.3%)** |  | **16 (4.4%)** | **25 (6.9%)** |  | **21 (5.8%)** | **20 (5.5%)** |  | **17 (4.7%)** | **24 (6.6%)** |  | **26 (7.2%)** | **15 (4.2%)** |  |
| **Other** | **3 (0.8%)** | **1 (0.3%)** |  | **2 (0.6%)** | **2 (0.6%)** |  | **3 (0.8%)** | **1 (0.3%)** |  | **2 (0.6%)** | **2 (0.6%)** |  | **3 (0.8%)** | **1 (0.3%)** |  | **1 (0.3%)** | **3 (0.8%)** |  | **4 (1.1%)** | **0 (0%)** |  | **3 (0.8%)** | **1 (0.3%)** |  | **3 (0.8%)** | **1 (0.3%)** |  | **1 (0.3%)** | **3 (0.8%)** |  | **2 (0.6%)** | **2 (0.6%)** |  |
| **Antireflux treatment, n (%)** |  |  | **0.524** |  |  | **0.188** |  |  | **0.799** |  |  | **0.684** |  |  | **0.226** |  |  | **0.684** |  |  | **0.491** |  |  | **1.000** |  |  | **1.000** |  |  | **0.364** |  |  | **0.970** |
| **No** | **66 (36.9%)** | **76 (42.5%)** |  | **61 (34.1%)** | **81 (45.3%)** |  | **71 (39.7%)** | **71 (39.7%)** |  | **69 (38.5%)** | **73 (40.8%)** |  | **72 (40.2%)** | **70 (39.1%)** |  | **73 (40.8%)** | **69 (38.5%)** |  | **73 (40.8%)** | **69 (38.5%)** |  | **71 (39.7%)** | **71 (39.7%)** |  | **72 (40.2%)** | **70 (39.1%)** |  | **74 (41.3%)** | **68 (38%)** |  | **70 (39.1%)** | **72 (40.2%)** |  |
| **Yes** | **20 (11.2%)** | **17 (9.5%)** |  | **21 (11.7%)** | **16 (8.9%)** |  | **20 (11.2%)** | **17 (9.5%)** |  | **20 (11.2%)** | **17 (9.5%)** |  | **14 (7.8%)** | **23 (12.8%)** |  | **17 (9.5%)** | **20 (11.2%)** |  | **22 (12.3%)** | **15 (8.4%)** |  | **18 (10.1%)** | **19 (10.6%)** |  | **19 (10.6%)** | **18 (10.1%)** |  | **23 (12.8%)** | **14 (7.8%)** |  | **19 (10.6%)** | **18 (10.1%)** |  |
| **Reflux history, n (%)** |  |  | **0.651** |  |  | **0.499** |  |  | **0.288** |  |  | **0.796** |  |  | **0.198** |  |  | **0.260** |  |  | **0.351** |  |  | **0.675** |  |  | **0.520** |  |  | **0.651** |  |  | **0.273** |
| **No** | **80 (37.4%)** | **95 (44.4%)** |  | **90 (42.1%)** | **85 (39.7%)** |  | **84 (39.3%)** | **91 (42.5%)** |  | **83 (38.8%)** | **92 (43%)** |  | **90 (42.1%)** | **85 (39.7%)** |  | **83 (38.8%)** | **92 (43%)** |  | **86 (40.2%)** | **89 (41.6%)** |  | **90 (42.1%)** | **85 (39.7%)** |  | **86 (40.2%)** | **89 (41.6%)** |  | **80 (37.4%)** | **95 (44.4%)** |  | **88 (41.1%)** | **87 (40.7%)** |  |
| **Yes** | **20 (9.3%)** | **19 (8.9%)** |  | **23 (10.7%)** | **16 (7.5%)** |  | **23 (10.7%)** | **16 (7.5%)** |  | **20 (9.3%)** | **19 (8.9%)** |  | **15 (7%)** | **24 (11.2%)** |  | **23 (10.7%)** | **16 (7.5%)** |  | **23 (10.7%)** | **16 (7.5%)** |  | **18 (8.4%)** | **21 (9.8%)** |  | **22 (10.3%)** | **17 (7.9%)** |  | **20 (9.3%)** | **19 (8.9%)** |  | **24 (11.2%)** | **15 (7%)** |  |
| **H pylori infection, n (%)** |  |  | **0.782** |  |  | **0.820** |  |  | **0.577** |  |  | **0.955** |  |  | **1.000** |  |  | **0.505** |  |  | **1.000** |  |  | **0.736** |  |  | **0.437** |  |  | **1.000** |  |  | **0.220** |
| **No** | **63 (38.7%)** | **82 (50.3%)** |  | **80 (49.1%)** | **65 (39.9%)** |  | **74 (45.4%)** | **71 (43.6%)** |  | **70 (42.9%)** | **75 (46%)** |  | **67 (41.1%)** | **78 (47.9%)** |  | **81 (49.7%)** | **64 (39.3%)** |  | **75 (46%)** | **70 (42.9%)** |  | **67 (41.1%)** | **78 (47.9%)** |  | **70 (42.9%)** | **75 (46%)** |  | **70 (42.9%)** | **75 (46%)** |  | **83 (50.9%)** | **62 (38%)** |  |
| **Yes** | **9 (5.5%)** | **9 (5.5%)** |  | **11 (6.7%)** | **7 (4.3%)** |  | **11 (6.7%)** | **7 (4.3%)** |  | **8 (4.9%)** | **10 (6.1%)** |  | **8 (4.9%)** | **10 (6.1%)** |  | **8 (4.9%)** | **10 (6.1%)** |  | **9 (5.5%)** | **9 (5.5%)** |  | **7 (4.3%)** | **11 (6.7%)** |  | **11 (6.7%)** | **7 (4.3%)** |  | **9 (5.5%)** | **9 (5.5%)** |  | **7 (4.3%)** | **11 (6.7%)** |  |
| **Barretts esophagus, n (%)** |  |  | **0.540** |  |  | **0.756** |  |  | **0.400** |  |  | **0.284** |  |  | **0.540** |  |  | **0.444** |  |  | **0.066** |  |  | **1.000** |  |  | **1.000** |  |  | **0.820** |  |  | **0.646** |
| **No** | **93 (44.7%)** | **100 (48.1%)** |  | **105 (50.5%)** | **88 (42.3%)** |  | **100 (48.1%)** | **93 (44.7%)** |  | **94 (45.2%)** | **99 (47.6%)** |  | **93 (44.7%)** | **100 (48.1%)** |  | **102 (49%)** | **91 (43.8%)** |  | **100 (48.1%)** | **93 (44.7%)** |  | **97 (46.6%)** | **96 (46.2%)** |  | **102 (49%)** | **91 (43.8%)** |  | **90 (43.3%)** | **103 (49.5%)** |  | **110 (52.9%)** | **83 (39.9%)** |  |
| **Yes** | **9 (4.3%)** | **6 (2.9%)** |  | **7 (3.4%)** | **8 (3.8%)** |  | **10 (4.8%)** | **5 (2.4%)** |  | **10 (4.8%)** | **5 (2.4%)** |  | **9 (4.3%)** | **6 (2.9%)** |  | **10 (4.8%)** | **5 (2.4%)** |  | **12 (5.8%)** | **3 (1.4%)** |  | **7 (3.4%)** | **8 (3.8%)** |  | **8 (3.8%)** | **7 (3.4%)** |  | **6 (2.9%)** | **9 (4.3%)** |  | **10 (4.8%)** | **5 (2.4%)** |  |
| **OS event, n (%)** |  |  | **0.800** |  |  | **0.038** |  |  | **0.063** |  |  | **0.022** |  |  | **0.865** |  |  | **0.219** |  |  | **0.099** |  |  | **0.099** |  |  | **0.309** |  |  | **0.967** |  |  | **0.219** |
| **Alive** | **112 (29.9%)** | **116 (30.9%)** |  | **124 (33.1%)** | **104 (27.7%)** |  | **123 (32.8%)** | **105 (28%)** |  | **125 (33.3%)** | **103 (27.5%)** |  | **115 (30.7%)** | **113 (30.1%)** |  | **120 (32%)** | **108 (28.8%)** |  | **122 (32.5%)** | **106 (28.3%)** |  | **122 (32.5%)** | **106 (28.3%)** |  | **119 (31.7%)** | **109 (29.1%)** |  | **113 (30.1%)** | **115 (30.7%)** |  | **120 (32%)** | **108 (28.8%)** |  |
| **Dead** | **75 (20%)** | **72 (19.2%)** |  | **63 (16.8%)** | **84 (22.4%)** |  | **64 (17.1%)** | **83 (22.1%)** |  | **62 (16.5%)** | **85 (22.7%)** |  | **72 (19.2%)** | **75 (20%)** |  | **67 (17.9%)** | **80 (21.3%)** |  | **65 (17.3%)** | **82 (21.9%)** |  | **65 (17.3%)** | **82 (21.9%)** |  | **68 (18.1%)** | **79 (21.1%)** |  | **74 (19.7%)** | **73 (19.5%)** |  | **67 (17.9%)** | **80 (21.3%)** |  |
| **DSS event, n (%)** |  |  | **0.911** |  |  | **0.089** |  |  | **0.130** |  |  | **0.251** |  |  | **0.713** |  |  | **0.039** |  |  | **0.505** |  |  | **0.249** |  |  | **0.813** |  |  | **0.366** |  |  | **0.162** |
| **Alive** | **128 (36.2%)** | **135 (38.1%)** |  | **139 (39.3%)** | **124 (35%)** |  | **136 (38.4%)** | **127 (35.9%)** |  | **133 (37.6%)** | **130 (36.7%)** |  | **128 (36.2%)** | **135 (38.1%)** |  | **139 (39.3%)** | **124 (35%)** |  | **134 (37.9%)** | **129 (36.4%)** |  | **136 (38.4%)** | **127 (35.9%)** |  | **130 (36.7%)** | **133 (37.6%)** |  | **132 (37.3%)** | **131 (37%)** |  | **137 (38.7%)** | **126 (35.6%)** |  |
| **Dead** | **43 (12.1%)** | **48 (13.6%)** |  | **38 (10.7%)** | **53 (15%)** |  | **38 (10.7%)** | **53 (15%)** |  | **39 (11%)** | **52 (14.7%)** |  | **47 (13.3%)** | **44 (12.4%)** |  | **36 (10.2%)** | **55 (15.5%)** |  | **42 (11.9%)** | **49 (13.8%)** |  | **40 (11.3%)** | **51 (14.4%)** |  | **43 (12.1%)** | **48 (13.6%)** |  | **40 (11.3%)** | **51 (14.4%)** |  | **39 (11%)** | **52 (14.7%)** |  |
| **PFI event, n (%)** |  |  | **0.770** |  |  | **0.941** |  |  | **0.013** |  |  | **0.164** |  |  | **0.715** |  |  | **0.013** |  |  | **0.770** |  |  | **0.464** |  |  | **0.941** |  |  | **0.884** |  |  | **0.464** |
| **Alive** | **127 (33.9%)** | **124 (33.1%)** |  | **126 (33.6%)** | **125 (33.3%)** |  | **137 (36.5%)** | **114 (30.4%)** |  | **132 (35.2%)** | **119 (31.7%)** |  | **123 (32.8%)** | **128 (34.1%)** |  | **137 (36.5%)** | **114 (30.4%)** |  | **127 (33.9%)** | **124 (33.1%)** |  | **129 (34.4%)** | **122 (32.5%)** |  | **126 (33.6%)** | **125 (33.3%)** |  | **124 (33.1%)** | **127 (33.9%)** |  | **129 (34.4%)** | **122 (32.5%)** |  |
| **Dead** | **60 (16%)** | **64 (17.1%)** |  | **61 (16.3%)** | **63 (16.8%)** |  | **50 (13.3%)** | **74 (19.7%)** |  | **55 (14.7%)** | **69 (18.4%)** |  | **64 (17.1%)** | **60 (16%)** |  | **50 (13.3%)** | **74 (19.7%)** |  | **60 (16%)** | **64 (17.1%)** |  | **58 (15.5%)** | **66 (17.6%)** |  | **61 (16.3%)** | **63 (16.8%)** |  | **63 (16.8%)** | **61 (16.3%)** |  | **58 (15.5%)** | **66 (17.6%)** |  |
| **Age, meidan (IQR)** | **66 (58, 72.75)** | **68 (58, 74)** | **0.459** | **66.58 ± 10.68** | **65.08 ± 10.6** | **0.177** | **65.64 ± 11.17** | **66.02 ± 10.13** | **0.730** | **65.59 ± 11.2** | **66.08 ± 10.09** | **0.659** | **66.5 (58, 72)** | **68 (58, 74)** | **0.279** | **68 (59, 74)** | **66 (57, 72)** | **0.185** | **66 (58, 72)** | **68 (58, 74)** | **0.239** | **65.02 ± 11** | **66.65 ± 10.26** | **0.140** | **66 (57, 72)** | **68 (59.5, 74)** | **0.104** | **65.8 ± 10.72** | **65.86 ± 10.61** | **0.950** | **67 (58, 73)** | **67.5 (58, 73.25)** | **0.794** |

**Table S2.** Risk assessment of NOTCH components on overall survival of STAD patients, analyzed by univariate and multivariate Cox regression.

| Characteristics | Total(N) | HR(95% CI) Univariate analysis | P value Univariate analysis | HR(95% CI) Multivariate analysis | P value Multivariate analysis |
| --- | --- | --- | --- | --- | --- |
| T stage (T3&T4 vs. T1&T2) | 362 | 1.719 (1.131-2.612) | 0.011 | 1.175 (0.627-2.200) | 0.615 |
| N stage (N1&N2&N3 vs. N0) | 352 | 1.925 (1.264-2.931) | 0.002 | 1.713 (0.816-3.597) | 0.155 |
| M stage (M1 vs. M0) | 352 | 2.254 (1.295-3.924) | 0.004 | 1.221 (0.541-2.754) | 0.631 |
| Age (>65 vs. <=65) | 367 | 1.620 (1.154-2.276) | 0.005 | 1.640 (1.065-2.526) | 0.025 |
| Gender (Male vs. Female) | 370 | 1.267 (0.891-1.804) | 0.188 |  |  |
| Race (White vs. Asian&Black or African American) | 320 | 1.248 (0.802-1.943) | 0.326 |  |  |
| Pathologic stage (Stage III&Stage IV vs. Stage I&Stage II) | 347 | 1.947 (1.358-2.793) | <0.001 | 1.171 (0.611-2.244) | 0.634 |
| Primary therapy outcome (PD&SD vs. PR&CR) | 313 | 4.103 (2.823-5.964) | <0.001 | 3.880 (2.538-5.933) | <0.001 |
| Residual tumour (R1&R2 vs. R0) | 325 | 3.445 (2.160-5.494) | <0.001 | 1.547 (0.840-2.849) | 0.161 |
| Reflux history (Yes vs. No) | 213 | 0.582 (0.291-1.162) | 0.125 |  |  |
| histologic grade (G2&G3 vs. G1) | 361 | 1.957 (0.484-7.910) | 0.346 |  |  |
| Antireflux treatment (No vs. Yes) | 179 | 1.323 (0.739-2.368) | 0.346 |  |  |
| H pylori infection (Yes vs. No) | 162 | 0.650 (0.279-1.513) | 0.317 |  |  |
| NOTCH1 gene expression (High vs. Low) | 370 | 0.791 (0.570-1.097) | 0.160 |  |  |
| NOTCH2 gene expression (High vs. Low) | 370 | 1.365 (0.981-1.901) | 0.065 | 1.455 (0.936-2.261) | 0.096 |
| NOTCH3 gene expression (High vs. Low) | 370 | 1.243 (0.892-1.733) | 0.198 |  |  |
| NOTCH4 gene expression (High vs. Low) | 370 | 1.348 (0.967-1.879) | 0.078 | 1.445 (0.933-2.239) | 0.099 |
| DLL1 gene expression (High vs. Low) | 370 | 1.121 (0.806-1.559) | 0.496 |  |  |
| DLL3 gene expression (High vs. Low) | 370 | 1.196 (0.861-1.662) | 0.286 |  |  |
| DLL4 gene expression (High vs. Low) | 370 | 1.232 (0.885-1.715) | 0.215 |  |  |
| JAG1 gene expression (High vs. Low) | 370 | 1.214 (0.873-1.687) | 0.249 |  |  |
| JAG2 gene expression (High vs. Low) | 370 | 1.009 (0.727-1.400) | 0.957 |  |  |
| HES1 gene expression (High vs. Low) | 370 | 1.009 (0.727-1.400) | 0.958 |  |  |
| HEY1 gene expression (High vs. Low) | 370 | 1.225 (0.882-1.701) | 0.225 |  |  |

**Table S3.** The top 20 GO terms-Biological processes (BP), enriched by the NOTCH family genes-strongly correlated genes.

| ONTOLOGY | ID | Description | GeneRatio | BgRatio | pvalue | p.adjust | qvalue | geneID | Count |
| --- | --- | --- | --- | --- | --- | --- | --- | --- | --- |
| BP | GO:0003158 | endothelium development | 15/137 | 132/18670 | 4.58273E-14 | 9.83455E-11 | 7.47709E-11 | ACVRL1/ADD1/BMPR2/CD34/CDH5/S1PR1/ENG/GJA4/GJA5/KDR/NOTCH4/PECAM1/HEG1/SOX17/COL18A1 | 15 |
| BP | GO:0030198 | extracellular matrix organization | 20/137 | 368/18670 | 2.97772E-12 | 2.33547E-09 | 1.77563E-09 | COL4A1/COL4A2/COL15A1/ENG/FBLN2/HSPG2/KDR/LAMA4/LAMC1/MMP14/NID1/PDGFB/PECAM1/VWF/PXDN/ADAMTS4/NID2/COL18A1/OLFML2A/SH3PXD2B | 20 |
| BP | GO:0043062 | extracellular structure organization | 21/137 | 422/18670 | 4.35315E-12 | 2.33547E-09 | 1.77563E-09 | CD34/COL4A1/COL4A2/COL15A1/ENG/FBLN2/HSPG2/KDR/LAMA4/LAMC1/MMP14/NID1/PDGFB/PECAM1/VWF/PXDN/ADAMTS4/NID2/COL18A1/OLFML2A/SH3PXD2B | 21 |
| BP | GO:1901342 | regulation of vasculature development | 21/137 | 422/18670 | 4.35315E-12 | 2.33547E-09 | 1.77563E-09 | ACVRL1/APLNR/CD34/CDH5/COL4A2/ENG/FLT1/GPR4/HSPG2/KDR/NPR1/PDGFB/PTPRM/TBXA2R/TEK/TIE1/VASH1/PLXND1/ADGRA2/RHOJ/MMRN2 | 21 |
| BP | GO:0045765 | regulation of angiogenesis | 20/137 | 383/18670 | 6.17244E-12 | 2.64921E-09 | 2.01417E-09 | ACVRL1/APLNR/CD34/CDH5/COL4A2/ENG/FLT1/GPR4/HSPG2/KDR/NPR1/PTPRM/TBXA2R/TEK/TIE1/VASH1/PLXND1/ADGRA2/RHOJ/MMRN2 | 20 |
| BP | GO:0061437 | renal system vasculature development | 8/137 | 27/18670 | 1.35008E-11 | 4.13895E-09 | 3.1468E-09 | CD34/GPR4/NOTCH3/PDGFB/PDGFRB/PECAM1/PKD2/TEK | 8 |
| BP | GO:0061440 | kidney vasculature development | 8/137 | 27/18670 | 1.35008E-11 | 4.13895E-09 | 3.1468E-09 | CD34/GPR4/NOTCH3/PDGFB/PDGFRB/PECAM1/PKD2/TEK | 8 |
| BP | GO:0061298 | retina vasculature development in camera-type eye | 7/137 | 17/18670 | 1.79557E-11 | 4.81663E-09 | 3.66202E-09 | ACVRL1/BMPR2/COL4A1/PDGFRB/FZD4/ARHGEF15/RHOJ | 7 |
| BP | GO:0001667 | ameboidal-type cell migration | 21/137 | 461/18670 | 2.29807E-11 | 5.47961E-09 | 4.16609E-09 | ACVRL1/BMPR2/FLT4/KDR/MYH9/PDGFB/PECAM1/PTPRM/TBXA2R/TEK/PPM1F/SEMA6B/VASH1/PLXND1/MACF1/ADGRA2/SEMA3G/RHOJ/SOX17/MMRN2/CLEC14A | 21 |
| BP | GO:0045446 | endothelial cell differentiation | 12/137 | 114/18670 | 4.36855E-11 | 9.3749E-09 | 7.12763E-09 | ACVRL1/ADD1/BMPR2/CDH5/S1PR1/ENG/KDR/NOTCH4/PECAM1/HEG1/SOX17/COL18A1 | 12 |
| BP | GO:0010631 | epithelial cell migration | 18/137 | 351/18670 | 1.02782E-10 | 2.00518E-08 | 1.52452E-08 | ACVRL1/BMPR2/FLT4/KDR/MYH9/PDGFB/PECAM1/PTPRM/TBXA2R/TEK/PPM1F/VASH1/PLXND1/MACF1/ADGRA2/RHOJ/MMRN2/CLEC14A | 18 |
| BP | GO:0090132 | epithelium migration | 18/137 | 354/18670 | 1.18065E-10 | 2.1114E-08 | 1.60528E-08 | ACVRL1/BMPR2/FLT4/KDR/MYH9/PDGFB/PECAM1/PTPRM/TBXA2R/TEK/PPM1F/VASH1/PLXND1/MACF1/ADGRA2/RHOJ/MMRN2/CLEC14A | 18 |
| BP | GO:0090130 | tissue migration | 18/137 | 360/18670 | 1.55158E-10 | 2.56129E-08 | 1.94732E-08 | ACVRL1/BMPR2/FLT4/KDR/MYH9/PDGFB/PECAM1/PTPRM/TBXA2R/TEK/PPM1F/VASH1/PLXND1/MACF1/ADGRA2/RHOJ/MMRN2/CLEC14A | 18 |
| BP | GO:0043542 | endothelial cell migration | 16/137 | 273/18670 | 1.71322E-10 | 2.62612E-08 | 1.99661E-08 | ACVRL1/BMPR2/FLT4/KDR/MYH9/PDGFB/PECAM1/PTPRM/TBXA2R/TEK/VASH1/PLXND1/ADGRA2/RHOJ/MMRN2/CLEC14A | 16 |
| BP | GO:0001570 | vasculogenesis | 10/137 | 79/18670 | 3.04333E-10 | 4.35399E-08 | 3.31029E-08 | APLNR/CD34/ENG/KDR/PDGFRB/TIE1/FZD4/RASIP1/HEG1/SOX17 | 10 |
| BP | GO:0072012 | glomerulus vasculature development | 7/137 | 25/18670 | 4.22645E-10 | 5.66873E-08 | 4.30987E-08 | CD34/GPR4/NOTCH3/PDGFB/PDGFRB/PECAM1/TEK | 7 |
| BP | GO:0032835 | glomerulus development | 9/137 | 62/18670 | 6.90554E-10 | 8.71722E-08 | 6.6276E-08 | CD34/GPR4/NID1/NOTCH3/PDGFB/PDGFRB/PECAM1/TEK/HEYL | 9 |
| BP | GO:0003007 | heart morphogenesis | 15/137 | 259/18670 | 7.77532E-10 | 9.26991E-08 | 7.04781E-08 | ACVRL1/BMPR2/S1PR1/ENG/GJA5/PKD2/TBX2/TEK/DCHS1/ADAMTS1/PLXND1/HEYL/HEG1/SOX17/CCM2L | 15 |
| BP | GO:0001935 | endothelial cell proliferation | 13/137 | 191/18670 | 1.57648E-09 | 1.7806E-07 | 1.35377E-07 | ACVRL1/APLNR/BMPR2/CD34/FLT1/FLT4/KDR/MMP14/PDGFB/PTPRM/TEK/DYSF/VASH1 | 13 |
| BP | GO:0060840 | artery development | 10/137 | 100/18670 | 3.20999E-09 | 3.44432E-07 | 2.61868E-07 | ACVRL1/BMPR2/ENG/GJA5/NOTCH3/PDGFRB/PKD2/TBX2/PLXND1/ADGRF5 | 10 |

**Table S4.** The top 20 GO terms-Cellular Components (CC), enriched by the NOTCH family genes-strongly correlated genes.

| ONTOLOGY | ID | Description | GeneRatio | BgRatio | pvalue | p.adjust | qvalue | geneID | Count |
| --- | --- | --- | --- | --- | --- | --- | --- | --- | --- |
| CC | GO:0005604 | basement membrane | 11/142 | 95/19717 | 8.51461E-11 | 1.14871E-08 | 9.5939E-09 | COL4A1/COL4A2/COL15A1/HSPG2/LAMA4/LAMC1/NID1/ADAMTS1/NID2/MMRN2/COL18A1 | 11 |
| CC | GO:0062023 | collagen-containing extracellular matrix | 19/142 | 406/19717 | 1.0786E-10 | 1.14871E-08 | 9.5939E-09 | COL4A1/COL4A2/COL15A1/FBLN2/HSPG2/LAMA4/LAMC1/LTBP2/NID1/PDGFB/VWF/PXDN/ADAMTS4/ADAMTS1/NID2/MMRN2/COL18A1/ADAMTS10/CLEC14A | 19 |
| CC | GO:0005911 | cell-cell junction | 19/142 | 459/19717 | 8.47839E-10 | 6.01966E-08 | 5.02754E-08 | ADD1/BMPR2/CDH5/GJA4/GJA5/MYH9/PECAM1/PKD2/PTPRM/TEK/FZD4/PCDH12/RASIP1/KIRREL1/PLXDC1/SHROOM4/HEG1/AHNAK/ESAM | 19 |
| CC | GO:0005925 | focal adhesion | 15/142 | 405/19717 | 2.40864E-07 | 1.06419E-05 | 8.888E-06 | ADD1/ENG/FLT1/HSPG2/MCAM/MMP14/MYH9/PDGFRB/TEK/STARD8/MRC2/TNS2/ARHGAP31/AHNAK/SCARF2 | 15 |
| CC | GO:0005924 | cell-substrate adherens junction | 15/142 | 408/19717 | 2.6469E-07 | 1.06419E-05 | 8.888E-06 | ADD1/ENG/FLT1/HSPG2/MCAM/MMP14/MYH9/PDGFRB/TEK/STARD8/MRC2/TNS2/ARHGAP31/AHNAK/SCARF2 | 15 |
| CC | GO:0030055 | cell-substrate junction | 15/142 | 412/19717 | 2.99773E-07 | 1.06419E-05 | 8.888E-06 | ADD1/ENG/FLT1/HSPG2/MCAM/MMP14/MYH9/PDGFRB/TEK/STARD8/MRC2/TNS2/ARHGAP31/AHNAK/SCARF2 | 15 |
| CC | GO:0009925 | basal plasma membrane | 5/142 | 34/19717 | 4.24583E-06 | 0.000129194 | 0.000107901 | BMPR2/CD34/PKD2/TEK/SHROOM4 | 5 |
| CC | GO:0044420 | extracellular matrix component | 5/142 | 51/19717 | 3.24885E-05 | 0.000768894 | 0.00064217 | COL4A1/COL4A2/COL15A1/LAMC1/ADAMTS10 | 5 |
| CC | GO:0045178 | basal part of cell | 5/142 | 51/19717 | 3.24885E-05 | 0.000768894 | 0.00064217 | BMPR2/CD34/PKD2/TEK/SHROOM4 | 5 |
| CC | GO:0098857 | membrane microdomain | 10/142 | 316/19717 | 9.97456E-05 | 0.002124581 | 0.001774421 | ADD1/BMPR2/S1PR1/KDR/PECAM1/TEK/DYSF/KIRREL1/AHNAK/PLVAP | 10 |
| CC | GO:0098589 | membrane region | 10/142 | 328/19717 | 0.000135324 | 0.002620372 | 0.002188499 | ADD1/BMPR2/S1PR1/KDR/PECAM1/TEK/DYSF/KIRREL1/AHNAK/PLVAP | 10 |
| CC | GO:0045121 | membrane raft | 9/142 | 315/19717 | 0.000471685 | 0.008270475 | 0.006907389 | ADD1/BMPR2/S1PR1/KDR/PECAM1/TEK/KIRREL1/AHNAK/PLVAP | 9 |
| CC | GO:0030027 | lamellipodium | 7/142 | 193/19717 | 0.000504771 | 0.008270475 | 0.006907389 | PKD2/PTPRM/DYSF/PLXND1/SSH1/ARHGAP31/FGD5 | 7 |
| CC | GO:0031252 | cell leading edge | 10/142 | 403/19717 | 0.000690435 | 0.010504468 | 0.008773191 | MYH9/PKD2/PTPRM/DYSF/LDB2/PLXND1/MACF1/SSH1/ARHGAP31/FGD5 | 10 |
| CC | GO:0005913 | cell-cell adherens junction | 5/142 | 117/19717 | 0.001585714 | 0.022517132 | 0.018806006 | ADD1/BMPR2/CDH5/MYH9/PTPRM | 5 |
| CC | GO:0045177 | apical part of cell | 9/142 | 384/19717 | 0.001888631 | 0.025142399 | 0.020998593 | BMPR2/CD34/PDGFRB/TEK/DCHS1/LZTS1/VASH1/SHROOM4/ADGRF5 | 9 |
| CC | GO:0009897 | external side of plasma membrane | 9/142 | 393/19717 | 0.002208568 | 0.02767206 | 0.023111332 | CD34/CDH5/S1PR1/ENG/MCAM/PECAM1/CD248/HEG1/CLEC14A | 9 |
| CC | GO:0005581 | collagen trimer | 4/142 | 87/19717 | 0.003615435 | 0.042782643 | 0.035731488 | COL4A1/COL4A2/COL15A1/COL18A1 | 4 |

**Table S5.** The top 20 GO terms-Molecular Functions (MF), enriched by the NOTCH family genes-strongly correlated genes.

| ONTOLOGY | ID | Description | GeneRatio | BgRatio | pvalue | p.adjust | qvalue | geneID | Count |
| --- | --- | --- | --- | --- | --- | --- | --- | --- | --- |
| MF | GO:0019838 | growth factor binding | 14/140 | 137/17697 | 4.01712E-12 | 1.18505E-09 | 1.05714E-09 | ACVRL1/BMPR2/COL4A1/ENG/FLT1/FLT4/LRRC32/KDR/LTBP2/PDGFB/PDGFRB/TEK/PXDN/VASN | 14 |
| MF | GO:0005201 | extracellular matrix structural constituent | 14/140 | 163/17697 | 4.30417E-11 | 6.34866E-09 | 5.66339E-09 | COL4A1/COL4A2/COL15A1/FBLN2/HSPG2/LAMA4/LAMC1/LTBP2/NID1/VWF/PXDN/NID2/MMRN2/COL18A1 | 14 |
| MF | GO:0019199 | transmembrane receptor protein kinase activity | 8/140 | 79/17697 | 2.03965E-07 | 2.00566E-05 | 1.78917E-05 | ACVRL1/BMPR2/FLT1/FLT4/KDR/PDGFRB/TEK/TIE1 | 8 |
| MF | GO:0004714 | transmembrane receptor protein tyrosine kinase activity | 6/140 | 62/17697 | 9.4029E-06 | 0.000693464 | 0.000618612 | FLT1/FLT4/KDR/PDGFRB/TEK/TIE1 | 6 |
| MF | GO:0050431 | transforming growth factor beta binding | 4/140 | 22/17697 | 2.45682E-05 | 0.001449524 | 0.001293064 | ACVRL1/ENG/LRRC32/VASN | 4 |
| MF | GO:0019955 | cytokine binding | 7/140 | 128/17697 | 7.11073E-05 | 0.002800516 | 0.00249823 | ACVRL1/BMPR2/ENG/LRRC32/PXDN/FZD4/VASN | 7 |
| MF | GO:0048407 | platelet-derived growth factor binding | 3/140 | 11/17697 | 7.63256E-05 | 0.002800516 | 0.00249823 | COL4A1/PDGFB/PDGFRB | 3 |
| MF | GO:0097493 | structural molecule activity conferring elasticity | 3/140 | 11/17697 | 7.63256E-05 | 0.002800516 | 0.00249823 | FBLN2/LAMC1/AHNAK | 3 |
| MF | GO:0050840 | extracellular matrix binding | 5/140 | 57/17697 | 8.67748E-05 | 0.002800516 | 0.00249823 | FBLN2/NID1/CD248/CLEC14A/OLFML2A | 5 |
| MF | GO:0004713 | protein tyrosine kinase activity | 7/140 | 134/17697 | 9.49327E-05 | 0.002800516 | 0.00249823 | FLT1/FLT4/KDR/PDGFRB/TEK/TIE1/HIPK3 | 7 |
| MF | GO:0005518 | collagen binding | 5/140 | 67/17697 | 0.000187876 | 0.005038484 | 0.004494633 | NID1/PDGFB/VWF/MRC2/NID2 | 5 |
| MF | GO:0030020 | extracellular matrix structural constituent conferring tensile strength | 4/140 | 41/17697 | 0.000302719 | 0.006957285 | 0.00620632 | COL4A1/COL4A2/COL15A1/COL18A1 | 4 |
| MF | GO:0045296 | cadherin binding | 10/140 | 331/17697 | 0.000306592 | 0.006957285 | 0.00620632 | ADD1/BMPR2/CDH5/KDR/MYH9/NOTCH3/PTPRM/MACF1/AHNAK/VASN | 10 |
| MF | GO:0050839 | cell adhesion molecule binding | 12/140 | 499/17697 | 0.000615573 | 0.01297101 | 0.011570928 | ADD1/BMPR2/CDH5/KDR/MMP14/MYH9/NOTCH3/PTPRM/VWF/MACF1/AHNAK/VASN | 12 |
| MF | GO:0004222 | metalloendopeptidase activity | 5/140 | 103/17697 | 0.001357179 | 0.026691186 | 0.023810157 | MMP14/ADAMTS4/ADAMTS1/ADAMTS7/ADAMTS10 | 5 |
| MF | GO:0016176 | superoxide-generating NADPH oxidase activator activity | 2/140 | 10/17697 | 0.002682307 | 0.049455037 | 0.044116893 | PDGFB/SH3PXD2B | 2 |
| MF | GO:0017048 | Rho GTPase binding | 6/140 | 177/17697 | 0.002859135 | 0.049614398 | 0.044259052 | ARHGEF17/ARHGEF15/PREX2/KCTD10/FMNL3/FGD5 | 6 |

**Table S6.** The top 20 KEGG signaling pathways, enriched by the NOTCH family genes-strongly correlated genes.

| ONTOLOGY | ID | Description | GeneRatio | BgRatio | pvalue | p.adjust | qvalue | geneID | Count |
| --- | --- | --- | --- | --- | --- | --- | --- | --- | --- |
| KEGG | hsa04510 | Focal adhesion | 10/56 | 201/8076 | 9.5762E-07 | 0.000129279 | 0.000104834 | COL4A1/COL4A2/FLT1/FLT4/KDR/LAMA4/LAMC1/PDGFB/PDGFRB/VWF | 10 |
| KEGG | hsa04151 | PI3K-Akt signaling pathway | 12/56 | 354/8076 | 4.0706E-06 | 0.000274766 | 0.000222812 | COL4A1/COL4A2/FLT1/FLT4/KDR/LAMA4/LAMC1/PDGFB/PDGFRB/TEK/VWF/CREB3L2 | 12 |
| KEGG | hsa05165 | Human papillomavirus infection | 11/56 | 331/8076 | 1.32008E-05 | 0.000594036 | 0.000481713 | COL4A1/COL4A2/LAMA4/LAMC1/NOTCH3/NOTCH4/PDGFRB/VWF/FZD4/HEYL/CREB3L2 | 11 |
| KEGG | hsa04512 | ECM-receptor interaction | 6/56 | 88/8076 | 2.9566E-05 | 0.000997853 | 0.000809175 | COL4A1/COL4A2/HSPG2/LAMA4/LAMC1/VWF | 6 |
| KEGG | hsa04015 | Rap1 signaling pathway | 8/56 | 210/8076 | 8.88155E-05 | 0.002398019 | 0.001944592 | FLT1/FLT4/KDR/PDGFB/PDGFRB/TEK/F2RL3/ADCY4 | 8 |
| KEGG | hsa05418 | Fluid shear stress and atherosclerosis | 6/56 | 139/8076 | 0.00037352 | 0.008404203 | 0.006815104 | BMPR2/CDH5/KDR/MEF2A/PDGFB/PECAM1 | 6 |

**Table S7. Results of the GSEA analysis based on the NOTCH family genes-significantly correlated genes.**

| ID | setSize | enrichmentScore | NES | pvalue | p.adjust | qvalues | rank | leading_edge |
| --- | --- | --- | --- | --- | --- | --- | --- | --- |
| REACTOME_COLLAGEN_BIOSYNTHESIS_AND_MODIFYING_ENZYMES | 30 | 0.716424687 | 2.194495369 | 0.002881844 | 0.130742446 | 0.124617958 | 262 | tags=57%, list=6%, signal=54% |
| REACTOME_COLLAGEN_FORMATION | 39 | 0.675106282 | 2.171829393 | 0.003030303 | 0.130742446 | 0.124617958 | 339 | tags=54%, list=8%, signal=50% |
| REACTOME_ASSEMBLY_OF_COLLAGEN_FIBRILS_AND_OTHER_MULTIMERIC_STRUCTURES | 27 | 0.7187429 | 2.157999489 | 0.00286533 | 0.130742446 | 0.124617958 | 513 | tags=63%, list=12%, signal=56% |
| REACTOME_ECM_PROTEOGLYCANS | 38 | 0.6735106 | 2.151859468 | 0.00308642 | 0.130742446 | 0.124617958 | 392 | tags=47%, list=9%, signal=44% |
| PID_SYNDECAN_1_PATHWAY | 20 | 0.752582821 | 2.105943106 | 0.002710027 | 0.130742446 | 0.124617958 | 270 | tags=50%, list=6%, signal=47% |
| REACTOME_COLLAGEN_DEGRADATION | 23 | 0.72278079 | 2.069618326 | 0.002857143 | 0.130742446 | 0.124617958 | 377 | tags=57%, list=8%, signal=52% |
| NABA_COLLAGENS | 18 | 0.756582369 | 2.066548225 | 0.002638522 | 0.130742446 | 0.124617958 | 262 | tags=56%, list=6%, signal=53% |
| REACTOME_COLLAGEN_CHAIN_TRIMERIZATION | 18 | 0.756582369 | 2.066548225 | 0.002638522 | 0.130742446 | 0.124617958 | 262 | tags=56%, list=6%, signal=53% |
| REACTOME_RRNA_MODIFICATION_IN_THE_NUCLEUS_AND_CYTOSOL | 11 | 0.864092021 | 2.065197728 | 0.002457002 | 0.130742446 | 0.124617958 | 510 | tags=91%, list=11%, signal=81% |
| REACTOME_SIGNALING_BY_PDGF | 33 | 0.662715631 | 2.059775948 | 0.003039514 | 0.130742446 | 0.124617958 | 456 | tags=33%, list=10%, signal=30% |
| REACTOME_MET_PROMOTES_CELL_MOTILITY | 25 | 0.681376228 | 2.021076022 | 0.00280112 | 0.130742446 | 0.124617958 | 677 | tags=52%, list=15%, signal=44% |
| REACTOME_INTEGRIN_CELL_SURFACE_INTERACTIONS | 42 | 0.609571609 | 2.015861738 | 0.00304878 | 0.130742446 | 0.124617958 | 526 | tags=50%, list=12%, signal=45% |
| REACTOME_CROSSLINKING_OF_COLLAGEN_FIBRILS | 10 | 0.85466705 | 2.014618191 | 0.002386635 | 0.130742446 | 0.124617958 | 339 | tags=70%, list=8%, signal=65% |
| WP_TYPE_I_COLLAGEN_SYNTHESIS_IN_THE_CONTEXT_OF_OSTEOGENESIS_IMPERFECTA | 15 | 0.775193956 | 2.012999224 | 0.002617801 | 0.130742446 | 0.124617958 | 245 | tags=53%, list=5%, signal=51% |
| PID_INTEGRIN3_PATHWAY | 18 | 0.734232392 | 2.005500934 | 0.002638522 | 0.130742446 | 0.124617958 | 674 | tags=56%, list=15%, signal=47% |
| REACTOME_RRNA_PROCESSING | 25 | 0.668572417 | 1.983097774 | 0.00280112 | 0.130742446 | 0.124617958 | 987 | tags=72%, list=22%, signal=56% |
| REACTOME_DEGRADATION_OF_THE_EXTRACELLULAR_MATRIX | 45 | 0.58889676 | 1.979403543 | 0.003095975 | 0.130742446 | 0.124617958 | 377 | tags=36%, list=8%, signal=33% |
| REACTOME_METABOLISM_OF_RNA | 127 | 0.478259684 | 1.968700216 | 0.003745318 | 0.132604238 | 0.126392536 | 1148 | tags=48%, list=26%, signal=37% |
| REACTOME_MET_ACTIVATES_PTK2_SIGNALING | 19 | 0.706502212 | 1.952637374 | 0.002702703 | 0.130742446 | 0.124617958 | 677 | tags=63%, list=15%, signal=54% |
| REACTOME_EXTRACELLULAR_MATRIX_ORGANIZATION | 119 | 0.472767417 | 1.925029181 | 0.003759398 | 0.132604238 | 0.126392536 | 526 | tags=39%, list=12%, signal=35% |
| REACTOME_IMMUNOREGULATORY_INTERACTIONS_BETWEEN_A_LYMPHOID_AND_A_NON_LYMPHOID_CELL | 20 | 0.671817876 | 1.879939569 | 0.002710027 | 0.130742446 | 0.124617958 | 535 | tags=55%, list=12%, signal=49% |
| REACTOME_GENE_SILENCING_BY_RNA | 19 | 0.678526725 | 1.875318462 | 0.002702703 | 0.130742446 | 0.124617958 | 1148 | tags=63%, list=26%, signal=47% |
| REACTOME_SIGNALING_BY_MET | 45 | 0.557894263 | 1.875197753 | 0.003095975 | 0.130742446 | 0.124617958 | 677 | tags=33%, list=15%, signal=29% |
| NABA_MATRISOME | 228 | 0.422316584 | 1.858083603 | 0.005102041 | 0.164965986 | 0.157238334 | 439 | tags=30%, list=10%, signal=28% |
| REACTOME_SYNDECAN_INTERACTIONS | 20 | 0.659127803 | 1.844429097 | 0.002710027 | 0.130742446 | 0.124617958 | 468 | tags=50%, list=11%, signal=45% |
| WP_INFLAMMATORY_RESPONSE_PATHWAY | 11 | 0.752716094 | 1.799006969 | 0.002457002 | 0.130742446 | 0.124617958 | 341 | tags=36%, list=8%, signal=34% |
| REACTOME_PLATELET_AGGREGATION_PLUG_FORMATION_ | 19 | 0.650465667 | 1.79776305 | 0.008108108 | 0.219484601 | 0.209203083 | 677 | tags=32%, list=15%, signal=27% |
| KEGG_CYTOKINE_CYTOKINE_RECEPTOR_INTERACTION | 48 | 0.529117886 | 1.792229144 | 0.003257329 | 0.130742446 | 0.124617958 | 348 | tags=29%, list=8%, signal=27% |
| KEGG_ECM_RECEPTOR_INTERACTION | 43 | 0.535937152 | 1.786049342 | 0.006134969 | 0.187923797 | 0.179120711 | 513 | tags=40%, list=12%, signal=35% |
| NABA_ECM_REGULATORS | 56 | 0.500284617 | 1.773406732 | 0.003205128 | 0.130742446 | 0.124617958 | 429 | tags=34%, list=10%, signal=31% |
| WP_HUMAN_COMPLEMENT_SYSTEM | 27 | 0.589354248 | 1.769514753 | 0.008595989 | 0.22234957 | 0.211933846 | 483 | tags=33%, list=11%, signal=30% |
| WP_MIR5093P_ALTERATION_OF_YAP1ECM_AXIS | 11 | 0.739558454 | 1.767559938 | 0.004914005 | 0.163425763 | 0.155770261 | 134 | tags=45%, list=3%, signal=44% |
| REACTOME_TRANSPORT_OF_MATURE_TRANSCRIPT_TO_CYTOPLASM | 20 | 0.628989403 | 1.760093189 | 0.010840108 | 0.247409533 | 0.235819902 | 1148 | tags=65%, list=26%, signal=48% |
| REACTOME_PROCESSING_OF_CAPPED_INTRON_CONTAINING_PRE_MRNA | 55 | 0.498021505 | 1.758400477 | 0.003215434 | 0.130742446 | 0.124617958 | 1344 | tags=53%, list=30%, signal=37% |
| WP_MIRNA_TARGETS_IN_ECM_AND_MEMBRANE_RECEPTORS | 21 | 0.613005089 | 1.72820187 | 0.011111111 | 0.248717949 | 0.237067027 | 366 | tags=48%, list=8%, signal=44% |
| NABA_MATRISOME_ASSOCIATED | 128 | 0.419253142 | 1.725532593 | 0.003731343 | 0.132604238 | 0.126392536 | 439 | tags=30%, list=10%, signal=28% |
| WP_HIPPOMERLIN_SIGNALING_DYSREGULATION | 51 | 0.493208905 | 1.714548904 | 0.006430868 | 0.191936681 | 0.182945615 | 867 | tags=47%, list=19%, signal=38% |
| REACTOME_TRANSCRIPTIONAL_REGULATION_BY_SMALL_RNAS | 14 | 0.675444384 | 1.710671219 | 0.007792208 | 0.215955473 | 0.205839274 | 1148 | tags=71%, list=26%, signal=53% |
| REACTOME_RECRUITMENT_OF_MITOTIC_CENTROSOME_PROTEINS_AND_COMPLEXES | 31 | 0.552950498 | 1.709491405 | 0.011627907 | 0.250645995 | 0.238904755 | 875 | tags=55%, list=20%, signal=44% |
| REACTOME_ANCHORING_OF_THE_BASAL_BODY_TO_THE_PLASMA_MEMBRANE | 36 | 0.540308507 | 1.692705607 | 0.009259259 | 0.225232198 | 0.21468144 | 787 | tags=53%, list=18%, signal=44% |
| PID_INTEGRIN1_PATHWAY | 37 | 0.531661296 | 1.681243113 | 0.009259259 | 0.225232198 | 0.21468144 | 341 | tags=35%, list=8%, signal=33% |
| NABA_CORE_MATRISOME | 100 | 0.423807477 | 1.669471771 | 0.003597122 | 0.132604238 | 0.126392536 | 397 | tags=29%, list=9%, signal=27% |
| REACTOME_MITOTIC_PROMETAPHASE | 57 | 0.445981031 | 1.602428176 | 0.009287926 | 0.225232198 | 0.21468144 | 787 | tags=42%, list=18%, signal=35% |
| WP_FOCAL_ADHESIONPI3KAKTMTORSIGNALING_PATHWAY | 120 | 0.38582851 | 1.574714176 | 0.007518797 | 0.215955473 | 0.205839274 | 366 | tags=18%, list=8%, signal=17% |
| REACTOME_DISEASES_OF_METABOLISM | 70 | 0.426637477 | 1.568808058 | 0.010204082 | 0.23755102 | 0.226423201 | 224 | tags=19%, list=5%, signal=18% |
| REACTOME_DNA_REPAIR | 78 | 0.408010676 | 1.549134858 | 0.009933775 | 0.235977835 | 0.224923709 | 1108 | tags=40%, list=25%, signal=30% |
| WP_MYOMETRIAL_RELAXATION_AND_CONTRACTION_PATHWAYS | 60 | -0.47879721 | -1.560689471 | 0.011577424 | 0.250645995 | 0.238904755 | 606 | tags=33%, list=14%, signal=29% |
| KEGG_VASCULAR_SMOOTH_MUSCLE_CONTRACTION | 40 | -0.560208284 | -1.672688849 | 0.00761035 | 0.215955473 | 0.205839274 | 871 | tags=42%, list=20%, signal=35% |
| REACTOME_ION_HOMEOSTASIS | 12 | -0.735799112 | -1.690480411 | 0.008319468 | 0.220087733 | 0.209777962 | 431 | tags=58%, list=10%, signal=53% |
| REACTOME_RET_SIGNALING | 17 | -0.681870346 | -1.702612935 | 0.004792332 | 0.163425763 | 0.155770261 | 687 | tags=35%, list=15%, signal=30% |
| WP_CALCIUM_REGULATION_IN_THE_CARDIAC_CELL | 48 | -0.542732952 | -1.708547804 | 0.005755396 | 0.181061637 | 0.172580001 | 978 | tags=46%, list=22%, signal=36% |
| REACTOME_FOXO_MEDIATED_TRANSCRIPTION | 25 | -0.645189045 | -1.752818206 | 0.003100775 | 0.130742446 | 0.124617958 | 765 | tags=44%, list=17%, signal=37% |
| REACTOME_CARDIAC_CONDUCTION | 28 | -0.656378581 | -1.832782496 | 0.001519757 | 0.130742446 | 0.124617958 | 869 | tags=68%, list=20%, signal=55% |
| REACTOME_MUSCLE_CONTRACTION | 43 | -0.636216279 | -1.950619 | 0.00147929 | 0.130742446 | 0.124617958 | 869 | tags=60%, list=20%, signal=49% |
